# Supplementary material
Source: publisher figshare collection journal article supplement (https://gsajournals.figshare.com/ndownloader/files/30829507)
Supplement: Supplementary file 1 [file 30829507]

Year	ID	Row	Root	Block	Block2	Family	Geosmin	Ln_Geosmin	Check
2017	100A-1	100A	1	A	A	4098	10.99	2.40
2017	100A-2	100A	2	A	A	4098	8.94	2.19
2017	101A-1	101A	1	A	A	4088	12.64	2.54
2017	102A-1	102A	1	A	A	4120	5.08	1.62
2017	102A-2	102A	2	A	A	4120	5.18	1.65
2017	104A-1	104A	1	A	A	4086	4.60	1.53
2017	104A-2	104A	2	A	A	4086	2.86	1.05
2017	105A-1	105A	1	A	A	4162	14.29	2.66
2017	105A-2	105A	2	A	A	4162	22.10	3.10
2017	106A-1	106A	1	A	A	4143	17.13	2.84
2017	106A-2	106A	2	A	A	4143	10.51	2.35
2017	108A-1	108A	1	A	A	4107	5.43	1.69
2017	108A-2	108A	2	A	A	4107	5.79	1.76
2017	110A-1	110A	1	A	A	TG	10.41	2.34	C
2017	111A-1	111A	1	A	A	4025	13.57	2.61
2017	112A-1	112A	1	A	A	4045	2.62	0.96
2017	112A-2	112A	2	A	A	4045	11.30	2.42
2017	113A-1	113A	1	A	A	4000	1.56	0.45
2017	288A-1	288A	1	A	A	4072	1.87	0.63
2017	288A-2	288A	2	A	A	4072	5.52	1.71
2017	289A-1	289A	1	A	A	4182	4.74	1.56
2017	289A-2	289A	2	A	A	4182	9.00	2.20
2017	290A-1	290A	1	A	A	4149	7.99	2.08
2017	290A-2	290A	2	A	A	4149	9.48	2.25
2017	293A-1	293A	1	A	A	4188	8.66	2.16
2017	293A-2	293A	2	A	A	4188	4.90	1.59
2017	295A-1	295A	1	A	A	4195	23.22	3.14
2017	295A-2	295A	2	A	A	4195	29.92	3.40
2017	296A-1	296A	1	A	A	4082	7.47	2.01
2017	296A-2	296A	2	A	A	4082	10.12	2.31
2017	297A-1	297A	1	A	A	4054	10.90	2.39
2017	297A-2	297A	2	A	A	4054	25.28	3.23
2017	298A-1	298A	1	A	A	4075	12.53	2.53
2017	298A-2	298A	2	A	A	4075	13.89	2.63
2017	299A-1	299A	1	A	A	4008	2.12	0.75
2017	300A-1	300A	1	A	A	Chiog	7.34	1.99	C
2017	301A-1	301A	1	A	A	4171	15.91	2.77
2017	301A-2	301A	2	A	A	4171	9.96	2.30
2017	302A-1	302A	1	A	A	4111	7.67	2.04
2017	302A-2	302A	2	A	A	4111	7.87	2.06
2017	303A-1	303A	1	A	A	4140	3.67	1.30
2017	305A-1	305A	1	A	A	4010	7.02	1.95
2017	305A-2	305A	2	A	A	4010	8.39	2.13
2017	306A-1	306A	1	A	A	4118	22.52	3.11
2017	307A-1	307A	1	A	A	4130	9.17	2.22
2017	307A-2	307A	2	A	A	4130	12.49	2.53
2017	308A-1	308A	1	A	A	4192	7.60	2.03
2017	308A-2	308A	2	A	A	4192	5.36	1.68
2017	310A-1	310A	1	A	A	4115	12.42	2.52
2017	310A-2	310A	2	A	A	4115	8.77	2.17
2017	311A-1	311A	1	A	A	4153	6.15	1.82
2017	311A-2	311A	2	A	A	4153	8.18	2.10
2017	313A-1	313A	1	A	A	4016	8.42	2.13
2017	313A-2	313A	2	A	A	4016	4.03	1.39
2017	488A-2	488A	2	A	A	4168	3.49	1.25
2017	493A-1	493A	1	A	A	4015	10.54	2.36
2017	493A-2	493A	2	A	A	4015	15.43	2.74
2017	494A-1	494A	1	A	A	Chiog	9.36	2.24	C
2017	495A-1	495A	1	A	A	4161	7.17	1.97
2017	495A-2	495A	2	A	A	4161	8.52	2.14
2017	496A-1	496A	1	A	A	4138	14.20	2.65
2017	496A-2	496A	2	A	A	4138	9.58	2.26
2017	497A-1	497A	1	A	A	4005	6.67	1.90
2017	497A-2	497A	2	A	A	4005	8.24	2.11
2017	498A-1	498A	1	A	A	4047	3.38	1.22
2017	498A-2	498A	2	A	A	4047	4.26	1.45
2017	499A-1	499A	1	A	A	4151	8.45	2.13
2017	499A-2	499A	2	A	A	4151	10.06	2.31
2017	501A-1	501A	1	A	A	4160	10.33	2.33
2017	501A-2	501A	2	A	A	4160	11.02	2.40
2017	502A-1	502A	1	A	A	4053	5.04	1.62
2017	502A-2	502A	2	A	A	4053	6.21	1.83
2017	503A-1	503A	1	A	A	4035	23.28	3.15
2017	503A-2	503A	2	A	A	4035	22.68	3.12
2017	504A-1	504A	1	A	A	4175	11.84	2.47
2017	504A-2	504A	2	A	A	4175	18.43	2.91
2017	505A-1	505A	1	A	A	4011	13.17	2.58
2017	505A-2	505A	2	A	A	4011	7.04	1.95
2017	506A-1	506A	1	A	A	Chiog	6.03	1.80	C
2017	507A-1	507A	1	A	A	4136	13.16	2.58
2017	507A-2	507A	2	A	A	4136	11.42	2.44
2017	511A-1	511A	1	A	A	4112	12.42	2.52
2017	511A-2	511A	2	A	A	4112	19.93	2.99
2017	512A-1	512A	1	A	A	4013	3.33	1.20
2017	512A-2	512A	2	A	A	4013	10.52	2.35
2017	513A-1	513A	1	A	A	4167	4.31	1.46
2017	689A-1	689A	1	A	A	4052	1.86	0.62
2017	689A-2	689A	2	A	A	4052	3.44	1.23
2017	690A-1	690A	1	A	A	4078	10.84	2.38
2017	690A-2	690A	2	A	A	4078	17.66	2.87
2017	691A-1	691A	1	A	A	4090	3.57	1.27
2017	691A-2	691A	2	A	A	4090	2.26	0.81
2017	692A-1	692A	1	A	A	4103	9.35	2.24
2017	692A-2	692A	2	A	A	4103	5.07	1.62
2017	693A-1	693A	1	A	A	4021	8.82	2.18
2017	693A-2	693A	2	A	A	4021	4.12	1.42
2017	694A-1	694A	1	A	A	4091	9.19	2.22
2017	694A-2	694A	2	A	A	4091	11.15	2.41
2017	695A-1	695A	1	A	A	Chiog	12.52	2.53	C
2017	696A-1	696A	1	A	A	4179	8.94	2.19
2017	696A-2	696A	2	A	A	4179	17.54	2.86
2017	697A-1	697A	1	A	A	4133	11.22	2.42
2017	697A-2	697A	2	A	A	4133	12.76	2.55
2017	699A-1	699A	1	A	A	4063	4.14	1.42
2017	699A-2	699A	2	A	A	4063	4.29	1.46
2017	702A-1	702A	1	A	A	4131	4.55	1.51
2017	702A-2	702A	2	A	A	4131	4.66	1.54
2017	703A-1	703A	1	A	A	4170	4.88	1.59
2017	703A-2	703A	2	A	A	4170	4.03	1.39
2017	704A-1	704A	1	A	A	4191	2.56	0.94
2017	704A-2	704A	2	A	A	4191	4.60	1.53
2017	705A-1	705A	1	A	A	4064	12.12	2.50
2017	705A-2	705A	2	A	A	4064	29.71	3.39
2017	706A-1	706A	1	A	A	4055	25.98	3.26
2017	706A-2	706A	2	A	A	4055	16.94	2.83
2017	707A-2	707A	2	A	A	4027	2.14	0.76
2017	89A-1	89A	1	A	A	4108	5.42	1.69
2017	89A-2	89A	2	A	A	4108	8.41	2.13
2017	90A-1	90A	1	A	A	4001	4.42	1.49
2017	90A-2	90A	2	A	A	4001	4.21	1.44
2017	91A-1	91A	1	A	A	4147	2.26	0.82
2017	92A-1	92A	1	A	A	4084	5.95	1.78
2017	92A-2	92A	2	A	A	4084	1.87	0.63
2017	93A-1	93A	1	A	A	4024	10.99	2.40
2017	94A-1	94A	1	A	A	4105	2.14	0.76
2017	94A-2	94A	2	A	A	4105	6.25	1.83
2017	96A-1	96A	1	A	A	4194	5.99	1.79
2017	96A-2	96A	2	A	A	4194	9.69	2.27
2017	97A-1	97A	1	A	A	4144	7.05	1.95
2017	98A-1	98A	1	A	A	4124	34.31	3.54
2017	98A-2	98A	2	A	A	4124	36.75	3.60
2017	99A-1	99A	1	A	A	4126	27.61	3.32
2017	99A-2	99A	2	A	A	4126	23.95	3.18
2017	101B-1	101B	1	B	B	4167	24.29	3.19
2017	101B-2	101B	2	B	B	4167	22.47	3.11
2017	104B-1	104B	1	B	B	4047	2.79	1.03
2017	104B-2	104B	2	B	B	4047	3.54	1.26
2017	105B-1	105B	1	B	B	4182	6.48	1.87
2017	105B-2	105B	2	B	B	4182	5.52	1.71
2017	107B-1	107B	1	B	B	4015	17.43	2.86
2017	107B-2	107B	2	B	B	4015	13.94	2.63
2017	108B-1	108B	1	B	B	4054	12.93	2.56
2017	108B-2	108B	2	B	B	4054	8.68	2.16
2017	109B-1	109B	1	B	B	4124	13.71	2.62
2017	109B-2	109B	2	B	B	4124	15.42	2.74
2017	110B-1	110B	1	B	B	4147	16.60	2.81
2017	111B-1	111B	1	B	B	4105	3.94	1.37
2017	111B-2	111B	2	B	B	4105	3.38	1.22
2017	112B-1	112B	1	B	B	4013	3.74	1.32
2017	112B-2	112B	2	B	B	4013	7.54	2.02
2017	288B-1	288B	1	B	B	4024	7.29	1.99
2017	288B-2	288B	2	B	B	4024	2.18	0.78
2017	289B-1	289B	1	B	B	4045	4.07	1.40
2017	289B-2	289B	2	B	B	4045	3.66	1.30
2017	291B-1	291B	1	B	B	4075	10.04	2.31
2017	291B-2	291B	2	B	B	4075	10.50	2.35
2017	292B-1	292B	1	B	B	4052	8.99	2.20
2017	292B-2	292B	2	B	B	4052	5.93	1.78
2017	293B-1	293B	1	B	B	4163	9.73	2.28
2017	293B-2	293B	2	B	B	4163	5.69	1.74
2017	295B-1	295B	1	B	B	4160	41.60	3.73
2017	295B-2	295B	2	B	B	4160	14.31	2.66
2017	296B-1	296B	1	B	B	4053	5.04	1.62
2017	296B-2	296B	2	B	B	4053	3.45	1.24
2017	297B-1	297B	1	B	B	4064	14.14	2.65
2017	297B-2	297B	2	B	B	4064	19.65	2.98
2017	298B-1	298B	1	B	B	4149	15.58	2.75
2017	298B-2	298B	2	B	B	4149	12.18	2.50
2017	299B-1	299B	1	B	B	4108	6.69	1.90
2017	299B-2	299B	2	B	B	4108	5.54	1.71
2017	300B-1	300B	1	B	B	4098	5.11	1.63
2017	300B-2	300B	2	B	B	4098	5.27	1.66
2017	302B-1	302B	1	B	B	4168	5.61	1.72
2017	302B-2	302B	2	B	B	4168	3.28	1.19
2017	303B-1	303B	1	B	B	4143	24.18	3.19
2017	303B-2	303B	2	B	B	4143	22.12	3.10
2017	304B-1	304B	1	B	B	4133	19.24	2.96
2017	304B-2	304B	2	B	B	4133	24.55	3.20
2017	305B-1	305B	1	B	B	4083	14.77	2.69
2017	305B-2	305B	2	B	B	4083	12.23	2.50
2017	306B-1	306B	1	B	B	4103	9.54	2.26
2017	306B-2	306B	2	B	B	4103	9.53	2.25
2017	307B-1	307B	1	B	B	4082	3.66	1.30
2017	307B-2	307B	2	B	B	4082	15.65	2.75
2017	308B-1	308B	1	B	B	4025	12.31	2.51
2017	308B-2	308B	2	B	B	4025	15.28	2.73
2017	309B-1	309B	1	B	B	4131	2.51	0.92
2017	309B-2	309B	2	B	B	4131	6.40	1.86
2017	310B-1	310B	1	B	B	4002	1.71	0.54
2017	310B-2	310B	2	B	B	4002	1.18	0.16
2017	311B-1	311B	1	B	B	4136	22.03	3.09
2017	311B-2	311B	2	B	B	4136	8.08	2.09
2017	313B-1	313B	1	B	B	4088	13.98	2.64
2017	313B-2	313B	2	B	B	4088	14.08	2.64
2017	488B-1	488B	1	B	B	4115	14.36	2.66
2017	488B-2	488B	2	B	B	4115	5.70	1.74
2017	489B-1	489B	1	B	B	4170	8.18	2.10
2017	489B-2	489B	2	B	B	4170	1.48	0.39
2017	490B-1	490B	1	B	B	4084	14.64	2.68
2017	490B-2	490B	2	B	B	4084	6.77	1.91
2017	491B-1	491B	1	B	B	4188	2.97	1.09
2017	491B-2	491B	2	B	B	4188	4.53	1.51
2017	493B-1	493B	1	B	B	4010	4.23	1.44
2017	493B-2	493B	2	B	B	4010	5.99	1.79
2017	495B-1	495B	1	B	B	4014	6.70	1.90
2017	495B-2	495B	2	B	B	4014	14.11	2.65
2017	497B-1	497B	1	B	B	4000	7.03	1.95
2017	498B-1	498B	1	B	B	4162	18.58	2.92
2017	498B-2	498B	2	B	B	4162	18.15	2.90
2017	499B-1	499B	1	B	B	4107	3.75	1.32
2017	499B-2	499B	2	B	B	4107	8.04	2.08
2017	500B-1	500B	1	B	B	4027	2.80	1.03
2017	500B-2	500B	2	B	B	4027	5.02	1.61
2017	501B-1	501B	1	B	B	4072	4.66	1.54
2017	501B-2	501B	2	B	B	4072	13.56	2.61
2017	502B-1	502B	1	B	B	4078	14.20	2.65
2017	502B-2	502B	2	B	B	4078	27.84	3.33
2017	503B-1	503B	1	B	B	4086	2.89	1.06
2017	503B-2	503B	2	B	B	4086	4.90	1.59
2017	504B-1	504B	1	B	B	Chiog	9.85	2.29	C
2017	505B-1	505B	1	B	B	4063	8.01	2.08
2017	505B-2	505B	2	B	B	4063	7.21	1.98
2017	506B-1	506B	1	B	B	4001	2.95	1.08
2017	506B-2	506B	2	B	B	4001	6.42	1.86
2017	508B-1	508B	1	B	B	4091	8.64	2.16
2017	508B-2	508B	2	B	B	4091	6.42	1.86
2017	509B-1	509B	1	B	B	4150	8.75	2.17
2017	509B-2	509B	2	B	B	4150	14.37	2.66
2017	510B-1	510B	1	B	B	Chiog	14.23	2.66	C
2017	512B-1	512B	1	B	B	4144	3.34	1.21
2017	512B-2	512B	2	B	B	4144	2.23	0.80
2017	688B-1	688B	1	B	B	4118	17.37	2.85
2017	688B-2	688B	2	B	B	4118	20.66	3.03
2017	689B-1	689B	1	B	B	TG	9.68	2.27	C
2017	690B-1	690B	1	B	B	4037	4.03	1.39
2017	690B-2	690B	2	B	B	4037	3.18	1.16
2017	691B-1	691B	1	B	B	4112	23.24	3.15
2017	691B-2	691B	2	B	B	4112	12.55	2.53
2017	693B-1	693B	1	B	B	4036	3.53	1.26
2017	693B-2	693B	2	B	B	4036	7.36	2.00
2017	695B-1	695B	1	B	B	TG	5.48	1.70	C
2017	697B-1	697B	1	B	B	4192	2.07	0.73
2017	698B-1	698B	1	B	B	4177	11.74	2.46
2017	698B-2	698B	2	B	B	4177	2.86	1.05
2017	699B-1	699B	1	B	B	4111	7.49	2.01
2017	699B-2	699B	2	B	B	4111	7.84	2.06
2017	700B-1	700B	1	B	B	4146	20.52	3.02
2017	701B-1	701B	1	B	B	TG	7.68	2.04	C
2017	702B-1	702B	1	B	B	4175	8.89	2.19
2017	702B-2	702B	2	B	B	4175	10.78	2.38
2017	703B-1	703B	1	B	B	4126	9.26	2.23
2017	703B-2	703B	2	B	B	4126	8.92	2.19
2017	704B-1	704B	1	B	B	4138	17.15	2.84
2017	704B-2	704B	2	B	B	4138	11.49	2.44
2017	705B-1	705B	1	B	B	Chiog	7.39	2.00	C
2017	706B-1	706B	1	B	B	4125	10.98	2.40
2017	706B-2	706B	2	B	B	4125	19.35	2.96
2017	707B-1	707B	1	B	B	4113	8.13	2.10
2017	707B-2	707B	2	B	B	4113	7.54	2.02
2017	93B-1	93B	1	B	B	4179	21.04	3.05
2017	96B-1	96B	1	B	B	Chiog	5.56	1.72	C
2017	97B-1	97B	1	B	B	4161	9.22	2.22
2019	1708-1	1708	1	A	C	4021	11.85	2.47
2019	1708-2	1708	2	A	C	4021	3.06	1.12
2019	1709-1	1709	1	A	C	4000	9.73	2.28
2019	1709-2	1709	2	A	C	4000	1.86	0.62
2019	1710-1	1710	1	A	C	4010	4.69	1.54
2019	1710-2	1710	2	A	C	4010	12.08	2.49
2019	1711-1	1711	1	A	C	4160	26.51	3.28
2019	1711-2	1711	2	A	C	4160	22.08	3.09
2019	1712-1	1712	1	A	C	4107	4.89	1.59
2019	1712-2	1712	2	A	C	4107	6.07	1.80
2019	1713-1	1713	1	A	C	4090	14.78	2.69
2019	1713-2	1713	2	A	C	4090	14.56	2.68
2019	1714-1	1714	1	A	C	4188	7.79	2.05
2019	1714-2	1714	2	A	C	4188	4.29	1.46
2019	1715-1	1715	1	A	C	4037	4.44	1.49
2019	1715-2	1715	2	A	C	4037	2.43	0.89
2019	1716-1	1716	1	A	C	4146	13.31	2.59
2019	1716-2	1716	2	A	C	4146	10.00	2.30
2019	1717-1	1717	1	A	C	TG	3.92	1.37	C
2019	1718-1	1718	1	A	C	4045	8.01	2.08
2019	1718-2	1718	2	A	C	4045	10.63	2.36
2019	1719-1	1719	1	A	C	4088	12.13	2.50
2019	1719-2	1719	2	A	C	4088	4.12	1.42
2019	1720-1	1720	1	A	C	4035	7.74	2.05
2019	1720-2	1720	2	A	C	4035	11.74	2.46
2019	1721-1	1721	1	A	C	4163	6.04	1.80
2019	1721-2	1721	2	A	C	4163	5.16	1.64
2019	1722-1	1722	1	A	C	4171	9.20	2.22
2019	1722-2	1722	2	A	C	4171	14.27	2.66
2019	1723-1	1723	1	A	C	4182	7.87	2.06
2019	1723-2	1723	2	A	C	4182	5.99	1.79
2019	1724-1	1724	1	A	C	4024	7.82	2.06
2019	1724-2	1724	2	A	C	4024	8.79	2.17
2019	1725-1	1725	1	A	C	4016	5.43	1.69
2019	1725-2	1725	2	A	C	4016	4.64	1.53
2019	1726-1	1726	1	A	C	4170	14.07	2.64
2019	1726-2	1726	2	A	C	4170	4.61	1.53
2019	1727-1	1727	1	A	C	4053	2.05	0.72
2019	1727-2	1727	2	A	C	4053	6.07	1.80
2019	1728-1	1728	1	A	C	4047	3.16	1.15
2019	1728-2	1728	2	A	C	4047	4.17	1.43
2019	1729-1	1729	1	A	C	4195	17.30	2.85
2019	1729-2	1729	2	A	C	4195	9.35	2.24
2019	1730-1	1730	1	A	C	4151	9.05	2.20
2019	1730-2	1730	2	A	C	4151	15.95	2.77
2019	1731-1	1731	1	A	C	4052	5.47	1.70
2019	1731-2	1731	2	A	C	4052	11.09	2.41
2019	1732-1	1732	1	A	C	4075	19.80	2.99
2019	1732-2	1732	2	A	C	4075	21.53	3.07
2019	1734-1	1734	1	A	C	Chiog	11.48	2.44	C
2019	1735-1	1735	1	A	C	4091	9.85	2.29
2019	1735-2	1735	2	A	C	4091	7.55	2.02
2019	1736-1	1736	1	A	C	4014	3.77	1.33
2019	1736-2	1736	2	A	C	4014	9.10	2.21
2019	1737-1	1737	1	A	C	4120	4.82	1.57
2019	1737-2	1737	2	A	C	4120	4.81	1.57
2019	1738-1	1738	1	A	C	4124	12.61	2.53
2019	1738-2	1738	2	A	C	4124	20.03	3.00
2019	1739-1	1739	1	A	C	4131	7.58	2.03
2019	1739-2	1739	2	A	C	4131	2.54	0.93
2019	1740-1	1740	1	A	C	4158	4.06	1.40
2019	1740-2	1740	2	A	C	4158	8.76	2.17
2019	1741-1	1741	1	A	C	4002	5.98	1.79
2019	1741-2	1741	2	A	C	4002	4.63	1.53
2019	1742-1	1742	1	A	C	4027	3.77	1.33
2019	1742-2	1742	2	A	C	4027	2.78	1.02
2019	1743-1	1743	1	A	C	4013	14.26	2.66
2019	1743-2	1743	2	A	C	4013	11.69	2.46
2019	1744-1	1744	1	A	C	4153	3.13	1.14
2019	1744-2	1744	2	A	C	4153	3.29	1.19
2019	1745-1	1745	1	A	C	4126	14.19	2.65
2019	1745-2	1745	2	A	C	4126	7.84	2.06
2019	1746-1	1746	1	A	C	4064	16.69	2.81
2019	1746-2	1746	2	A	C	4064	20.52	3.02
2019	1747-1	1747	1	A	C	4177	11.18	2.41
2019	1747-2	1747	2	A	C	4177	7.53	2.02
2019	1748-1	1748	1	A	C	4086	4.61	1.53
2019	1748-2	1748	2	A	C	4086	3.28	1.19
2019	1749-1	1749	1	A	C	4084	15.44	2.74
2019	1749-2	1749	2	A	C	4084	5.71	1.74
2019	1750-1	1750	1	A	C	4112	14.09	2.65
2019	1750-2	1750	2	A	C	4112	19.34	2.96
2019	1751-1	1751	1	A	C	4113	10.36	2.34
2019	1751-2	1751	2	A	C	4113	12.72	2.54
2019	1752-1	1752	1	A	C	4191	2.22	0.80
2019	1753-1	1753	1	A	C	4179	9.50	2.25
2019	1753-2	1753	2	A	C	4179	8.55	2.15
2019	1754-1	1754	1	A	C	4149	19.40	2.97
2019	1754-2	1754	2	A	C	4149	16.24	2.79
2019	1755-1	1755	1	A	C	4098	15.06	2.71
2019	1755-2	1755	2	A	C	4098	10.54	2.36
2019	1756-1	1756	1	A	C	4005	9.12	2.21
2019	1756-2	1756	2	A	C	4005	6.21	1.83
2019	1757-1	1757	1	A	C	4011	21.89	3.09
2019	1757-2	1757	2	A	C	4011	23.08	3.14
2019	1758-1	1758	1	A	C	4168	6.29	1.84
2019	1758-2	1758	2	A	C	4168	9.14	2.21
2019	1759-1	1759	1	A	C	4055	28.23	3.34
2019	1759-2	1759	2	A	C	4055	16.21	2.79
2019	1760-1	1760	1	A	C	4083	11.69	2.46
2019	1760-2	1760	2	A	C	4083	15.16	2.72
2019	1761-1	1761	1	A	C	4144	5.71	1.74
2019	1761-2	1761	2	A	C	4144	5.50	1.70
2019	1762-1	1762	1	A	C	4008	7.47	2.01
2019	1762-2	1762	2	A	C	4008	9.08	2.21
2019	1763-1	1763	1	A	C	4082	15.64	2.75
2019	1763-2	1763	2	A	C	4082	10.41	2.34
2019	1764-1	1764	1	A	C	4125	11.98	2.48
2019	1764-2	1764	2	A	C	4125	22.18	3.10
2019	1765-1	1765	1	A	C	4138	10.30	2.33
2019	1765-2	1765	2	A	C	4138	18.86	2.94
2019	1766-1	1766	1	A	C	4001	4.42	1.49
2019	1766-2	1766	2	A	C	4001	2.16	0.77
2019	1767-1	1767	1	A	C	4054	18.41	2.91
2019	1767-2	1767	2	A	C	4054	26.23	3.27
2019	1768-1	1768	1	A	C	4108	3.16	1.15
2019	1768-2	1768	2	A	C	4108	6.97	1.94
2019	1769-2	1769	2	A	C	4194	14.56	2.68
2019	1770-1	1770	1	A	C	4133	12.10	2.49
2019	1770-2	1770	2	A	C	4133	15.09	2.71
2019	1771-1	1771	1	A	C	Chiog	15.89	2.77	C
2019	1772-1	1772	1	A	C	Chiog	7.67	2.04	C
2019	1773-1	1773	1	A	C	4136	14.79	2.69
2019	1773-2	1773	2	A	C	4136	12.41	2.52
2019	1774-1	1774	1	A	C	4103	10.03	2.31
2019	1774-2	1774	2	A	C	4103	7.31	1.99
2019	1775-1	1775	1	A	C	4143	15.80	2.76
2019	1775-2	1775	2	A	C	4143	25.44	3.24
2019	1776-1	1776	1	A	C	4078	15.61	2.75
2019	1776-2	1776	2	A	C	4078	22.72	3.12
2019	1777-1	1777	1	A	C	4042	8.98	2.20
2019	1777-2	1777	2	A	C	4042	15.53	2.74
2019	1778-1	1778	1	A	C	4140	1.35	0.30
2019	1778-2	1778	2	A	C	4140	2.22	0.80
2019	1779-1	1779	1	A	C	4063	16.90	2.83
2019	1779-2	1779	2	A	C	4063	4.49	1.50
2019	1780-1	1780	1	A	C	4105	1.69	0.52
2019	1780-2	1780	2	A	C	4105	2.62	0.96
2019	1781-1	1781	1	A	C	4072	5.20	1.65
2019	1781-2	1781	2	A	C	4072	8.61	2.15
2019	1782-1	1782	1	A	C	TG	12.14	2.50	C
2019	1783-1	1783	1	A	C	4161	7.57	2.02
2019	1783-2	1783	2	A	C	4161	13.46	2.60
2019	1784-1	1784	1	A	C	4118	5.55	1.71
2019	1784-2	1784	2	A	C	4118	7.22	1.98
2019	1785-1	1785	1	A	C	4165	17.00	2.83
2019	1785-2	1785	2	A	C	4165	2.68	0.99
2019	1786-1	1786	1	A	C	4192	5.11	1.63
2019	1787-1	1787	1	A	C	4150	17.85	2.88
2019	1787-2	1787	2	A	C	4150	21.46	3.07
2019	1788-1	1788	1	A	C	Chiog	10.20	2.32	C
2019	1789-1	1789	1	A	C	4115	14.82	2.70
2019	1789-2	1789	2	A	C	4115	8.76	2.17
2019	1790-1	1790	1	A	C	4036	29.97	3.40
2019	1790-2	1790	2	A	C	4036	8.91	2.19
2019	1791-1	1791	1	A	C	4167	20.33	3.01
2019	1791-2	1791	2	A	C	4167	12.99	2.56
2019	1792-1	1792	1	A	C	4130	16.52	2.80
2019	1792-2	1792	2	A	C	4130	16.61	2.81
2019	1793-1	1793	1	A	C	4105	4.18	1.43
2019	1793-2	1793	2	A	C	4105	3.65	1.30
2019	1794-1	1794	1	A	C	TG	6.75	1.91	C
2019	1795-1	1795	1	A	C	4111	18.92	2.94
2019	1795-2	1795	2	A	C	4111	14.44	2.67
2019	1796-1	1796	1	A	C	TG	7.03	1.95	C
2019	1797-1	1797	1	A	C	4147	16.32	2.79
2019	1797-2	1797	2	A	C	4147	4.80	1.57
2019	1798-1	1798	1	A	C	4175	25.08	3.22
2019	1798-2	1798	2	A	C	4175	19.34	2.96
2019	1799-1	1799	1	A	C	4162	19.56	2.97
2019	1799-2	1799	2	A	C	4162	8.95	2.19
2019	1802-1	1802	1	B	D	4136	8.14	2.10
2019	1802-2	1802	2	B	D	4136	10.54	2.36
2019	1804-1	1804	1	B	D	4192	11.21	2.42
2019	1804-2	1804	2	B	D	4192	3.53	1.26
2019	1805-1	1805	1	B	D	4162	15.03	2.71
2019	1805-2	1805	2	B	D	4162	15.62	2.75
2019	1806-1	1806	1	B	D	4177	3.40	1.22
2019	1806-2	1806	2	B	D	4177	17.75	2.88
2019	1807-1	1807	1	B	D	4024	6.88	1.93
2019	1807-2	1807	2	B	D	4024	10.47	2.35
2019	1808-1	1808	1	B	D	4078	13.09	2.57
2019	1808-2	1808	2	B	D	4078	13.81	2.63
2019	1809-1	1809	1	B	D	4086	2.04	0.71
2019	1809-2	1809	2	B	D	4086	6.98	1.94
2019	1810-1	1810	1	B	D	4036	6.74	1.91
2019	1810-2	1810	2	B	D	4036	12.46	2.52
2019	1811-1	1811	1	B	D	4008	9.38	2.24
2019	1811-2	1811	2	B	D	4008	6.80	1.92
2019	1812-1	1812	1	B	D	4175	19.22	2.96
2019	1812-2	1812	2	B	D	4175	23.01	3.14
2019	1813-1	1813	1	B	D	TG	4.41	1.48	C
2019	1814-1	1814	1	B	D	4160	13.11	2.57
2019	1814-2	1814	2	B	D	4160	12.26	2.51
2019	1815-1	1815	1	B	D	4131	6.01	1.79
2019	1815-2	1815	2	B	D	4131	6.38	1.85
2019	1816-1	1816	1	B	D	4171	11.94	2.48
2019	1816-2	1816	2	B	D	4171	18.61	2.92
2019	1817-1	1817	1	B	D	4143	10.75	2.38
2019	1817-2	1817	2	B	D	4143	19.53	2.97
2019	1818-1	1818	1	B	D	4035	12.12	2.49
2019	1818-2	1818	2	B	D	4035	1.71	0.54
2019	1819-1	1819	1	B	D	4042	3.77	1.33
2019	1819-2	1819	2	B	D	4042	7.28	1.99
2019	1820-1	1820	1	B	D	4013	17.70	2.87
2019	1821-1	1821	1	B	D	4163	8.89	2.18
2019	1821-2	1821	2	B	D	4163	4.08	1.41
2019	1822-1	1822	1	B	D	4147	3.68	1.30
2019	1822-2	1822	2	B	D	4147	5.50	1.70
2019	1823-1	1823	1	B	D	4015	20.53	3.02
2019	1823-2	1823	2	B	D	4015	18.64	2.93
2019	1824-1	1824	1	B	D	4144	2.49	0.91
2019	1824-2	1824	2	B	D	4144	2.69	0.99
2019	1825-1	1825	1	B	D	4168	8.28	2.11
2019	1825-2	1825	2	B	D	4168	9.24	2.22
2019	1826-1	1826	1	B	D	4052	5.58	1.72
2019	1826-2	1826	2	B	D	4052	2.14	0.76
2019	1827-1	1827	1	B	D	4149	27.79	3.32
2019	1827-2	1827	2	B	D	4149	16.86	2.82
2019	1828-1	1828	1	B	D	4082	7.39	2.00
2019	1828-2	1828	2	B	D	4082	10.41	2.34
2019	1829-1	1829	1	B	D	4075	12.28	2.51
2019	1829-2	1829	2	B	D	4075	17.88	2.88
2019	1830-1	1830	1	B	D	4045	4.60	1.53
2019	1830-2	1830	2	B	D	4045	8.20	2.10
2019	1831-1	1831	1	B	D	4125	24.11	3.18
2019	1831-2	1831	2	B	D	4125	18.27	2.91
2019	1832-2	1832	2	B	D	4010	13.61	2.61
2019	1833-1	1833	1	B	D	4158	20.57	3.02
2019	1833-2	1833	2	B	D	4158	11.39	2.43
2019	1834-1	1834	1	B	D	4182	4.41	1.48
2019	1834-2	1834	2	B	D	4182	4.69	1.55
2019	1835-1	1835	1	B	D	4063	8.22	2.11
2019	1835-2	1835	2	B	D	4063	6.54	1.88
2019	1836-1	1836	1	B	D	4011	5.27	1.66
2019	1836-2	1836	2	B	D	4011	18.84	2.94
2019	1837-1	1837	1	B	D	4088	14.06	2.64
2019	1837-2	1837	2	B	D	4088	10.15	2.32
2019	1838-1	1838	1	B	D	4047	2.70	0.99
2019	1838-2	1838	2	B	D	4047	6.04	1.80
2019	1839-1	1839	1	B	D	4015	12.79	2.55
2019	1839-2	1839	2	B	D	4015	3.00	1.10
2019	1840-1	1840	1	B	D	4084	4.29	1.46
2019	1840-2	1840	2	B	D	4084	10.41	2.34
2019	1841-1	1841	1	B	D	4150	20.07	3.00
2019	1841-2	1841	2	B	D	4150	15.15	2.72
2019	1842-1	1842	1	B	D	4098	6.04	1.80
2019	1842-2	1842	2	B	D	4098	7.66	2.04
2019	1843-1	1843	1	B	D	4107	6.70	1.90
2019	1843-2	1843	2	B	D	4107	3.05	1.12
2019	1844-1	1844	1	B	D	4126	12.34	2.51
2019	1844-2	1844	2	B	D	4126	5.26	1.66
2019	1845-1	1845	1	B	D	4108	8.11	2.09
2019	1845-2	1845	2	B	D	4108	5.01	1.61
2019	1846-1	1846	1	B	D	4170	5.33	1.67
2019	1846-2	1846	2	B	D	4170	10.06	2.31
2019	1847-1	1847	1	B	D	4027	0.77	-0.27
2019	1847-2	1847	2	B	D	4027	2.34	0.85
2019	1848-1	1848	1	B	D	4138	7.87	2.06
2019	1848-2	1848	2	B	D	4138	5.04	1.62
2019	1849-1	1849	1	B	D	4118	24.50	3.20
2019	1849-2	1849	2	B	D	4118	10.32	2.33
2019	1851-1	1851	1	B	D	4112	11.92	2.48
2019	1851-2	1851	2	B	D	4112	10.30	2.33
2019	1852-1	1852	1	B	D	TG	8.38	2.13	C
2019	1854-1	1854	1	B	D	4133	25.76	3.25
2019	1854-2	1854	2	B	D	4133	15.53	2.74
2019	1855-1	1855	1	B	D	4037	6.55	1.88
2019	1855-2	1855	2	B	D	4037	2.91	1.07
2019	1856-1	1856	1	B	D	4111	10.50	2.35
2019	1857-1	1857	1	B	D	4194	19.70	2.98
2019	1857-2	1857	2	B	D	4194	9.31	2.23
2019	1858-1	1858	1	B	D	Chiog	4.36	1.47	C
2019	1859-1	1859	1	B	D	4055	17.37	2.85
2019	1859-2	1859	2	B	D	4055	19.14	2.95
2019	1860-1	1860	1	B	D	4140	7.81	2.06
2019	1860-2	1860	2	B	D	4140	5.87	1.77
2019	1861-1	1861	1	B	D	4016	5.27	1.66
2019	1861-2	1861	2	B	D	4016	4.88	1.59
2019	1862-1	1862	1	B	D	4120	2.84	1.05
2019	1862-2	1862	2	B	D	4120	2.25	0.81
2019	1863-1	1863	1	B	D	4072	15.81	2.76
2019	1863-2	1863	2	B	D	4072	14.67	2.69
2019	1864-1	1864	1	B	D	Chiog	19.29	2.96	C
2019	1865-1	1865	1	B	D	4124	17.37	2.85
2019	1865-2	1865	2	B	D	4124	17.85	2.88
2019	1866-1	1866	1	B	D	4151	11.10	2.41
2019	1866-2	1866	2	B	D	4151	6.90	1.93
2019	1867-1	1867	1	B	D	TG	11.86	2.47	C
2019	1868-1	1868	1	B	D	4002	3.46	1.24
2019	1868-2	1868	2	B	D	4002	2.36	0.86
2019	1869-1	1869	1	B	D	4083	11.37	2.43
2019	1869-2	1869	2	B	D	4083	11.78	2.47
2019	1870-1	1870	1	B	D	4191	3.20	1.16
2019	1870-2	1870	2	B	D	4191	21.33	3.06
2019	1871-1	1871	1	B	D	4005	15.13	2.72
2019	1871-2	1871	2	B	D	4005	8.62	2.15
2019	1873-1	1873	1	B	D	4025	4.10	1.41
2019	1873-2	1873	2	B	D	4025	3.27	1.18
2019	1874-1	1874	1	B	D	4000	8.76	2.17
2019	1874-2	1874	2	B	D	4000	4.54	1.51
2019	1875-1	1875	1	B	D	4153	12.77	2.55
2019	1875-2	1875	2	B	D	4153	5.89	1.77
2019	1876-1	1876	1	B	D	4113	8.57	2.15
2019	1876-2	1876	2	B	D	4113	9.70	2.27
2019	1877-1	1877	1	B	D	4091	6.71	1.90
2019	1877-2	1877	2	B	D	4091	5.81	1.76
2019	1878-1	1878	1	B	D	4064	31.71	3.46
2019	1878-2	1878	2	B	D	4064	26.92	3.29
2019	1879-1	1879	1	B	D	4054	16.75	2.82
2019	1880-1	1880	1	B	D	4146	22.54	3.12
2019	1880-2	1880	2	B	D	4146	13.60	2.61
2019	1881-1	1881	1	B	D	4195	17.75	2.88
2019	1881-2	1881	2	B	D	4195	10.19	2.32
2019	1882-1	1882	1	B	D	4115	10.42	2.34
2019	1882-2	1882	2	B	D	4115	4.43	1.49
2019	1883-1	1883	1	B	D	4001	3.65	1.30
2019	1883-2	1883	2	B	D	4001	4.23	1.44
2019	1884-1	1884	1	B	D	Chiog	5.64	1.73	C
2019	1885-1	1885	1	B	D	TG	8.46	2.13	C
2019	1886-1	1886	1	B	D	4165	28.08	3.34
2019	1886-2	1886	2	B	D	4165	20.36	3.01
2019	1887-1	1887	1	B	D	4130	8.49	2.14
2019	1887-2	1887	2	B	D	4130	6.70	1.90
2019	1888-1	1888	1	B	D	Chiog	5.02	1.61	C
2019	1889-1	1889	1	B	D	4014	6.16	1.82
2019	1889-2	1889	2	B	D	4014	20.00	3.00
2019	1890-1	1890	1	B	D	4179	15.40	2.73
2019	1890-2	1890	2	B	D	4179	5.71	1.74
2019	1891-1	1891	1	B	D	4167	22.51	3.11
2019	1891-2	1891	2	B	D	4167	18.53	2.92
2019	1892-1	1892	1	B	D	4161	8.11	2.09
2019	1892-2	1892	2	B	D	4161	6.84	1.92
2019	1893-1	1893	1	B	D	4021	7.90	2.07
2019	1893-2	1893	2	B	D	4021	7.15	1.97
